# Supplementary material
Source: PubMed Central journal article supplement (PMC5562951)
Supplement: NIHMS892701-supplement-Supplemental_.pdf [file NIHMS892701-supplement-Supplemental_.pdf]

## SUPPLEMENTARY FIGURES AND VIDEOS

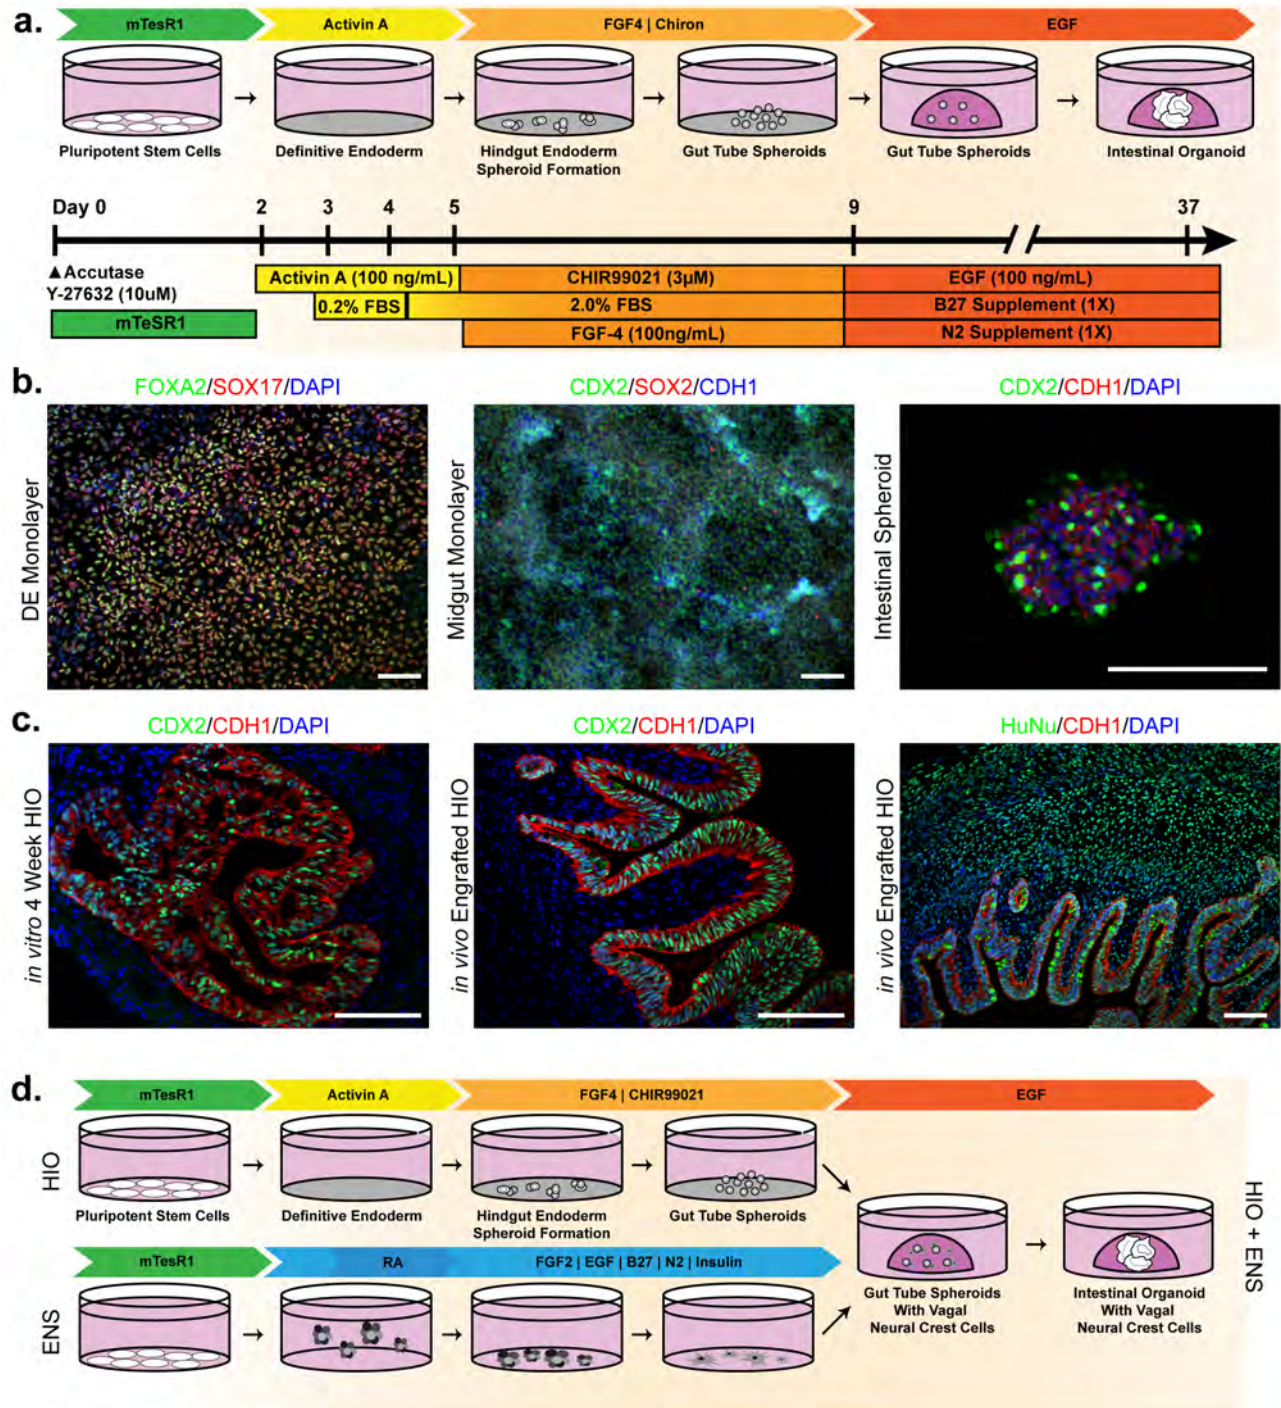

### Supplementary Figure 1. Generation of Human Intestinal Organoids (HIOs).

(a) Method for generating HIOs through directed differentiation of human pluripotent stem cells. (b) Temporal expression of differentiation markers at each stage of HIO development. Activin A mediated efficient differentiation into definitive endoderm

(FOXA2<sup>+</sup> and SOX17<sup>+</sup>) and WNT activation in combination with FGF4 induced CDX2 expression in monolayers and free-floating spheroids. Data representative of 3 independent experiments. **(c)** Growth of spheroids in Matrigel for 4 weeks resulted in the formation of HIOs expressing CDX2<sup>+</sup> epithelium. Data representative of 6 independent experiments. HIOs were engrafted into the kidney subcapsular space of mice, where after 6 weeks they grew and matured to form intestinal tissue with crypts and villi. The human-specific antibody HuNu shows that intestinal epithelium and mesenchyme are human in origin. Data representative of 3 independent experiments. Scale bars, 100  $\mu$ m **(d)** Schematic for generating and incorporating vagal NCCs into HIOs (to accompany figure 1). HIOs and NCCs are generated separately, combined by low-speed centrifugation, embedded in Matrigel and grown for 4 weeks *in vitro*.



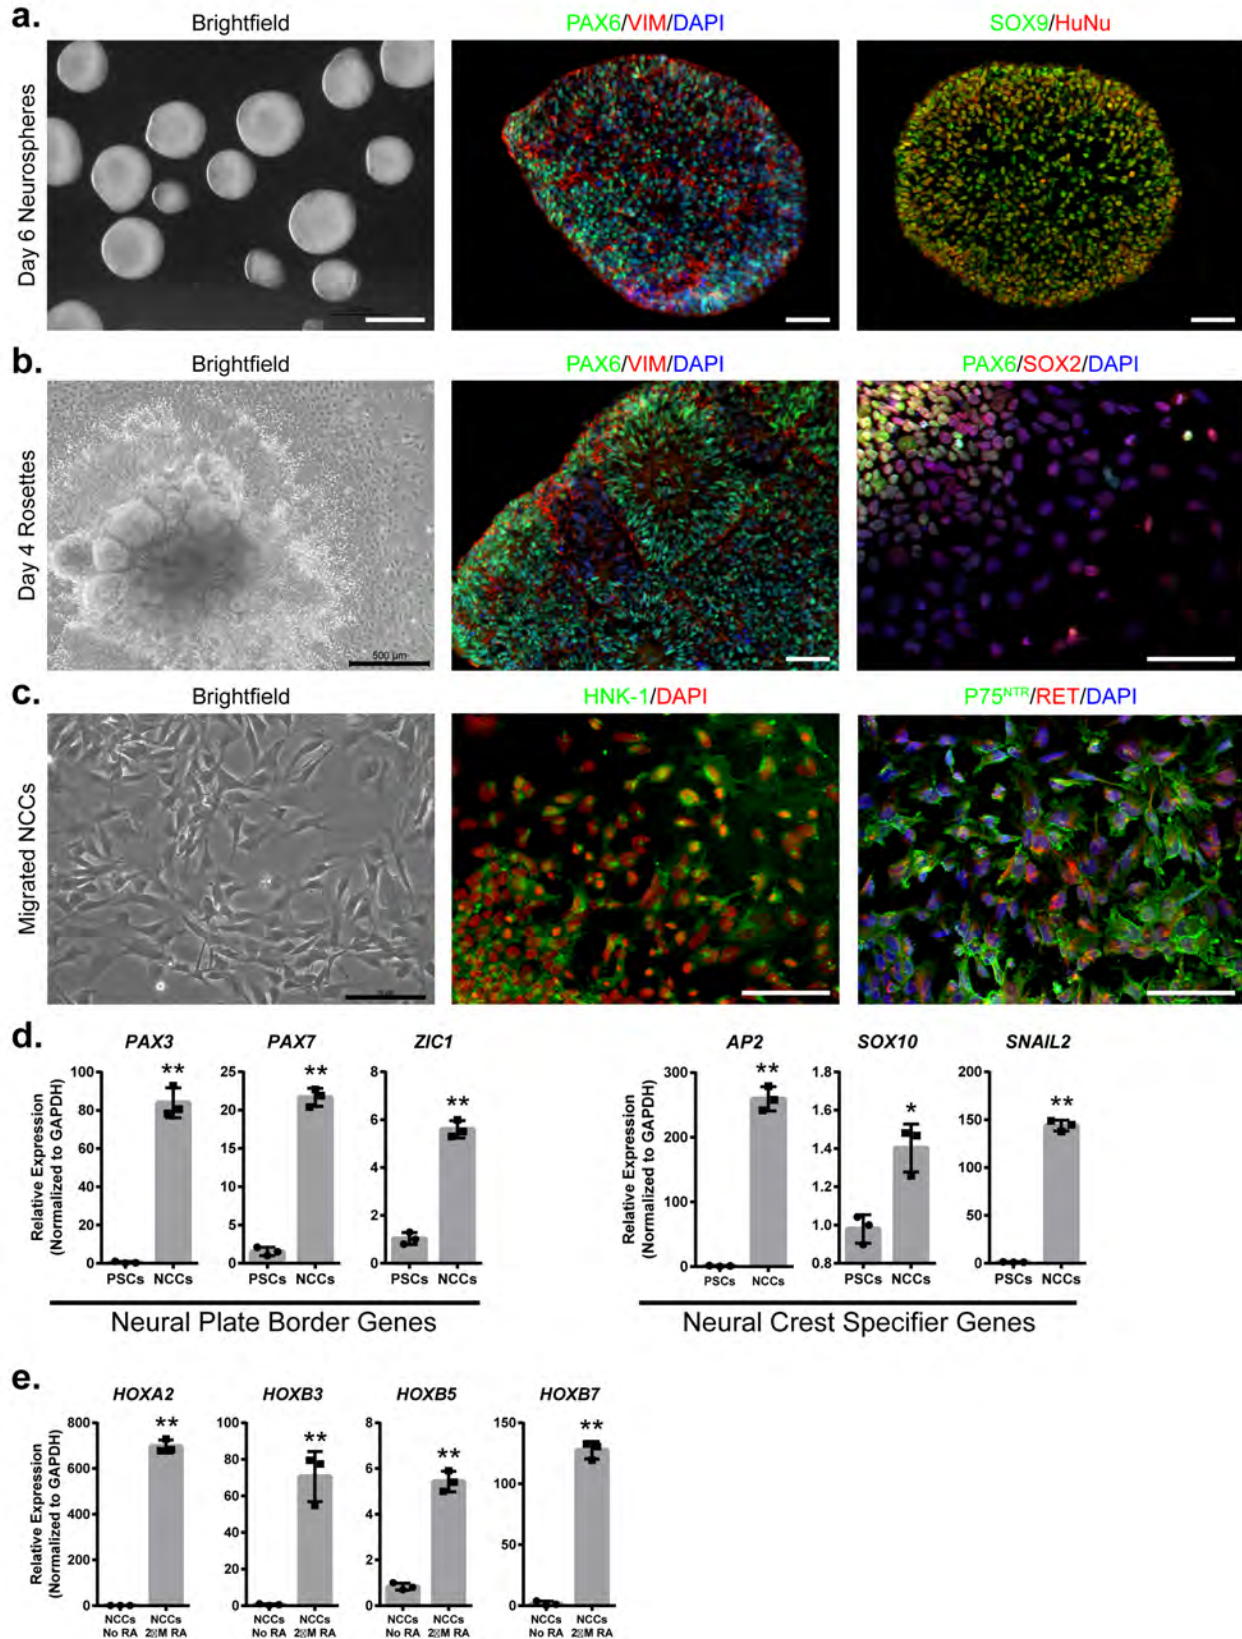

**Supplementary Figure 2.** Generation of vagal-like Neural Crest Cells (NCCs).

**(a)** Day 6 free-floating neurospheres are roughly 500  $\mu\text{m}$  in diameter and positive for PAX6, Vimentin, and SOX9, characteristic of neural stem cells and the lateral neural plate where neural crest cells form. **(b)** Neurospheres attached to a fibronectin substrate and formed neural rosettes visible with bright field microscopy. Attached neurospheres broadly expressed PAX6 whereas Vimentin staining was observed at the edge of neural rosettes where NCCs were delaminating. As NCCs migrated away from rosettes, PAX6 was down regulated whereas SOX2 expression was maintained. Scale bars, 500  $\mu\text{m}$  (left panels), 100  $\mu\text{m}$  (middle and right panels). **(c)** NCCs displayed stellate morphology and were positive for surface markers HNK-1, p75<sup>NTR</sup>, and RET. Scale bars, 50  $\mu\text{m}$  (left panel), 100  $\mu\text{m}$  (middle and right panels). **(d)** Quantitative RT-PCR analysis of neural plate border genes and regulators of neural crest cell specification. **(e)** Treatment of neurospheres for 48 hours with RA results in the formation of NCCs that express Vagal-level *HOX* genes. Values in graphs represent mean  $\pm$  s.e.m.; \*  $P < 0.01$ , \*\*  $P < 0.001$ ; Student's *t*-test (two-tailed, unpaired);  $n=3$  (cell culture replicates) per condition; data representative of 3 independent experiments.

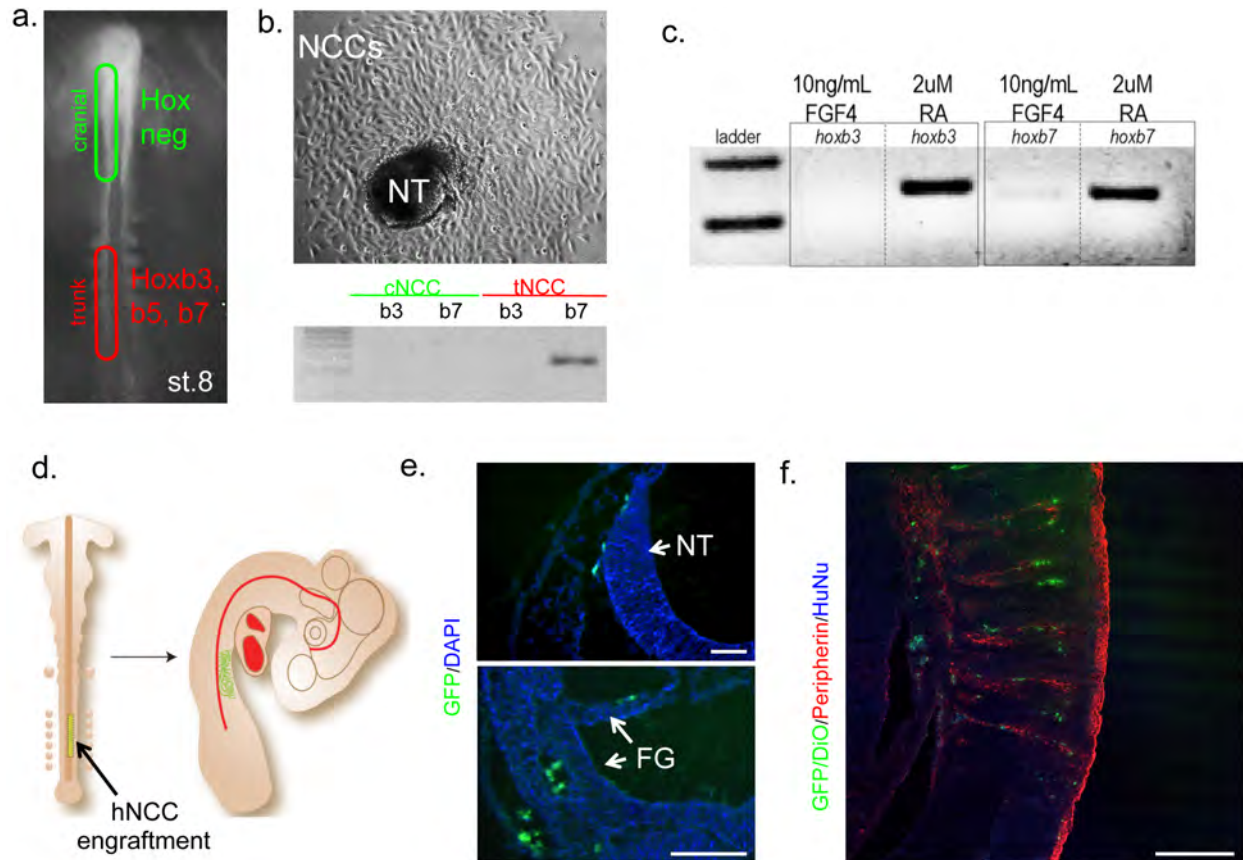

**Supplementary Figure 3. Comparison of human and chick NCC behavior.**

**(a and b)** Isolation and culturing of cranial (*Hox*-negative) and trunk (*Hox*-positive) NCCs from chick embryos and analysis of *Hox* gene expression. NCCs isolated from anterior chicken neural tube do not express *Hox* genes while those isolated from posterior neural tube are *HoxB7* positive. **(c)** Chicken cranial NCCs express vagal-level *Hox* genes *HoxB3* and *HoxB7* when treated with 2  $\mu$ M RA for 48 hours. A different posteriorizing factor, FGF4, had no effect on *Hox* gene expression. **(d)** Schematic describing engraftment of human PSC-derived NCCs into chicken embryos. GFP-labeled human NCCs were injected intersomatically into HH10-12 chick embryos *in ovo*. **(e)** Embryos were analyzed at ~HH23. GFP-labeled cells had migrated laterally along the neural tube (NT) and could be found colonizing the foregut (FG). Scale bar, 100  $\mu$ m. **(f)** Differentiation of GFP-labeled cells into peripheral neurons (Peripherin) (dorsal, right; anterior, up). Scale bar, 500  $\mu$ m. Data representative of 5 independent experiments injecting human NCCs into chick embryos.



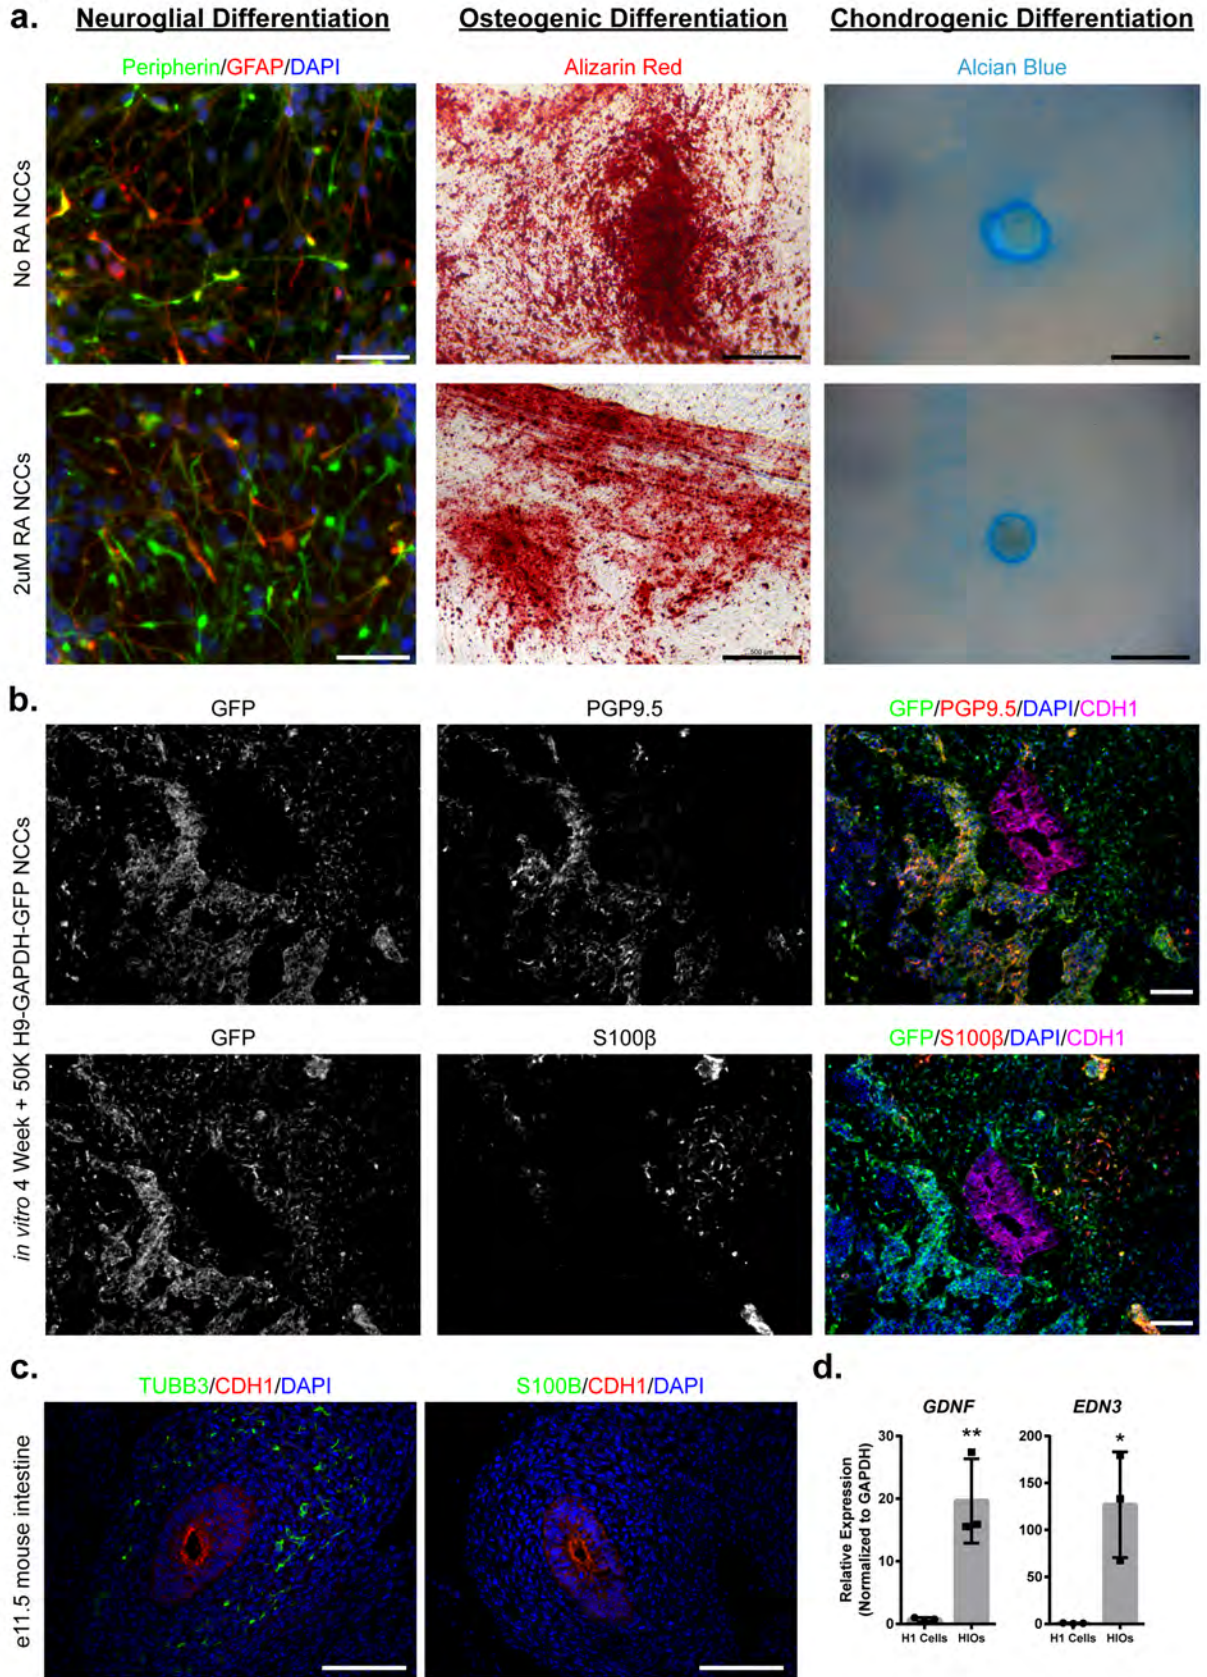

**Supplementary Figure 4.** Differentiation potential of cranial (- RA) and vagal-like (- RA) NCCs and expression of NCC migratory cues.

**(a)** *In vitro* differentiation of human PSC-derived NCCs into neuroglial lineages and mesenchymal lineages (osteocytes and chondrocytes). Cranial and RA-treated NCCs were equally competent to form neuroglial lineages (Peripherin and GFAP), osteocytes (alizarin red), and chondrocytes (alcian blue) *in vitro*. Scale bars, 50  $\mu\text{m}$  (left panels), 500  $\mu\text{m}$  (middle and right panels). Data representative of 2 independent experiments. **(b)** NCCs were generated from *H9-GAPDH-GFP* human ESCs, which ubiquitously express GFP, and combined with HIOs generated from H1 ESCs. HIOs were co-stained for GFP and pan-neuronal marker PGP9.5 or glial marker S100 $\beta$ . Neuroglial cells in HIOs+ENS are NCC-derived as is evidenced by co-expression of GFP and neuroglial markers. Scale bars, 100  $\mu\text{m}$ . Data representative of 3 independent experiments. **(c)** Small intestine of E11.5 mouse embryo showed a similar distribution of neurons compared to HIOs+ENS *in vitro*. Although glial progenitors are present in the gut of E11.5 mouse embryos, S100 $\beta$  is not expressed until E14.5 suggesting that HIOs+ENS are slightly more mature than E11.5 intestine. Scale bars, 100  $\mu\text{m}$ . **(d)** HIOs formed *in vitro* expressed *GDNF* and *EDN3*. Values in graphs represent mean  $\pm$  s.e.m.; \*  $P < 0.05$ , \*\*  $P < 0.01$ ; *t*-test (two-tailed, unpaired);  $n=3$  (cell culture replicates). Data are representative of 2 independent experiments.

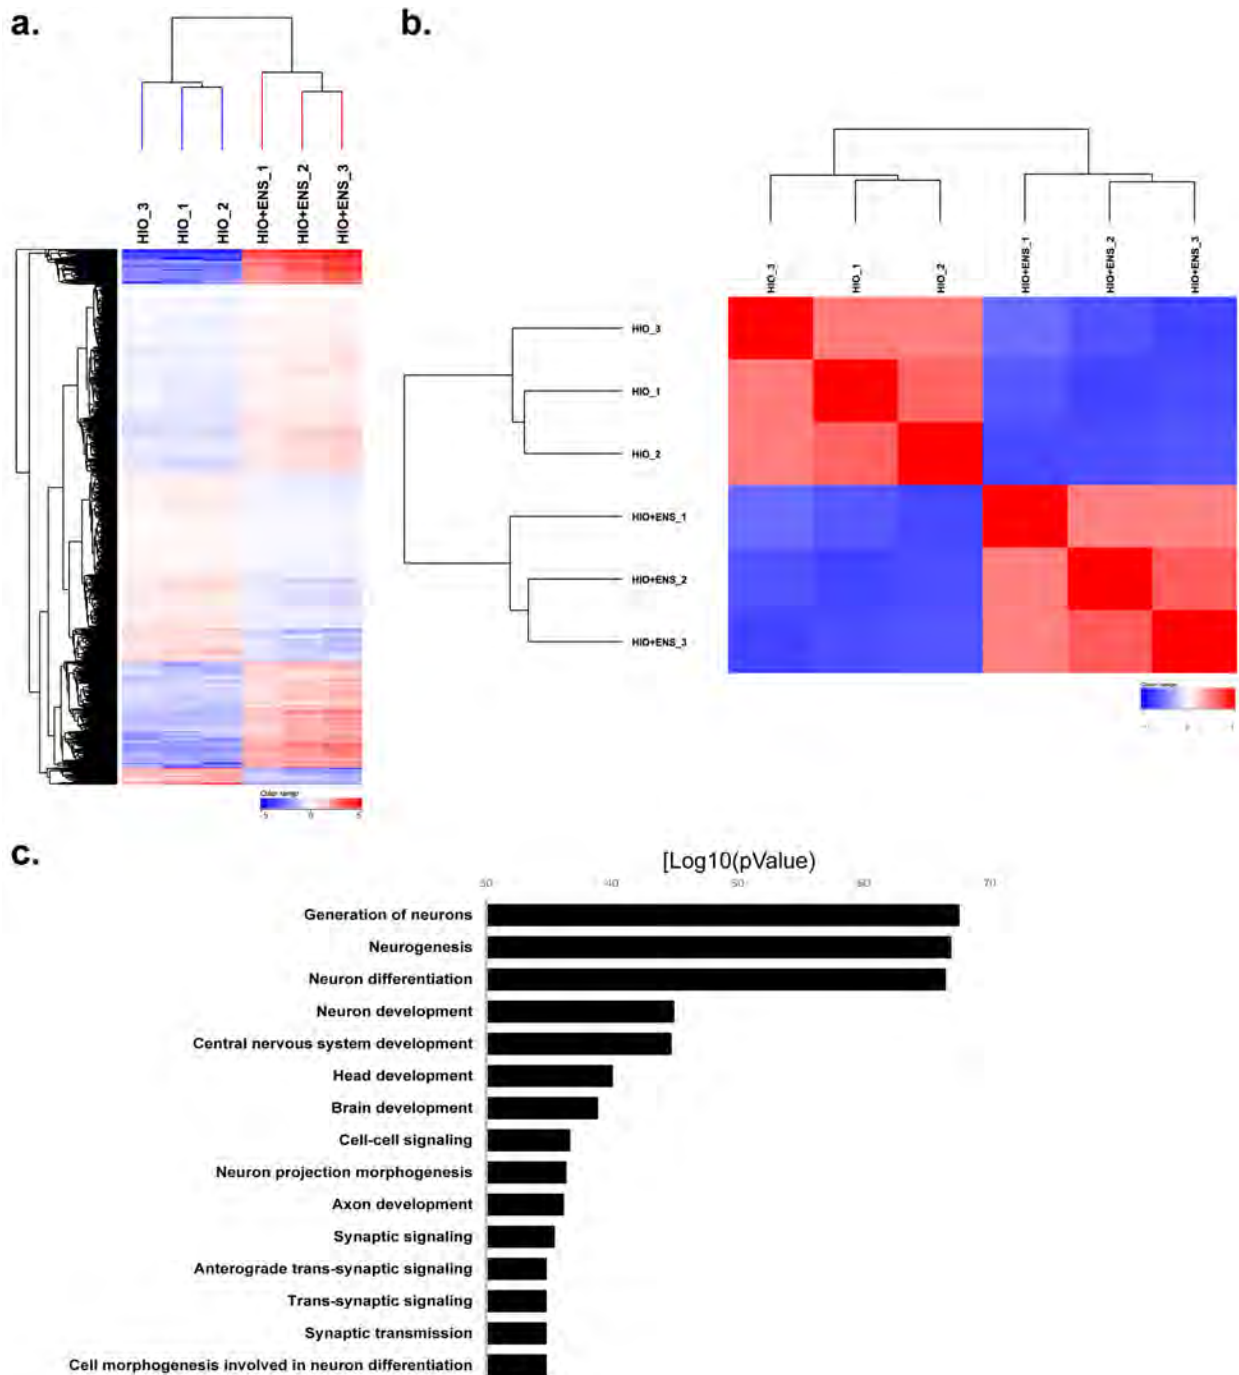

**Supplementary Figure 5.** Differential gene expression in HIOs+ENS *in vitro*.

**(a)** Heatmap was generated clustering on both gene and condition, using the Euclidean distance metric and Average linkage rule. HIOs and HIOs+ENS clustered separately according to their gene expression pattern. **(b)** Spearman correlation matrix confirmed that HIOs and HIOs+ENS presented separate and distinct cluster patterns based on gene expression. **(c)** Barplots of top 15 ontological enrichments in HIOs+ENS.



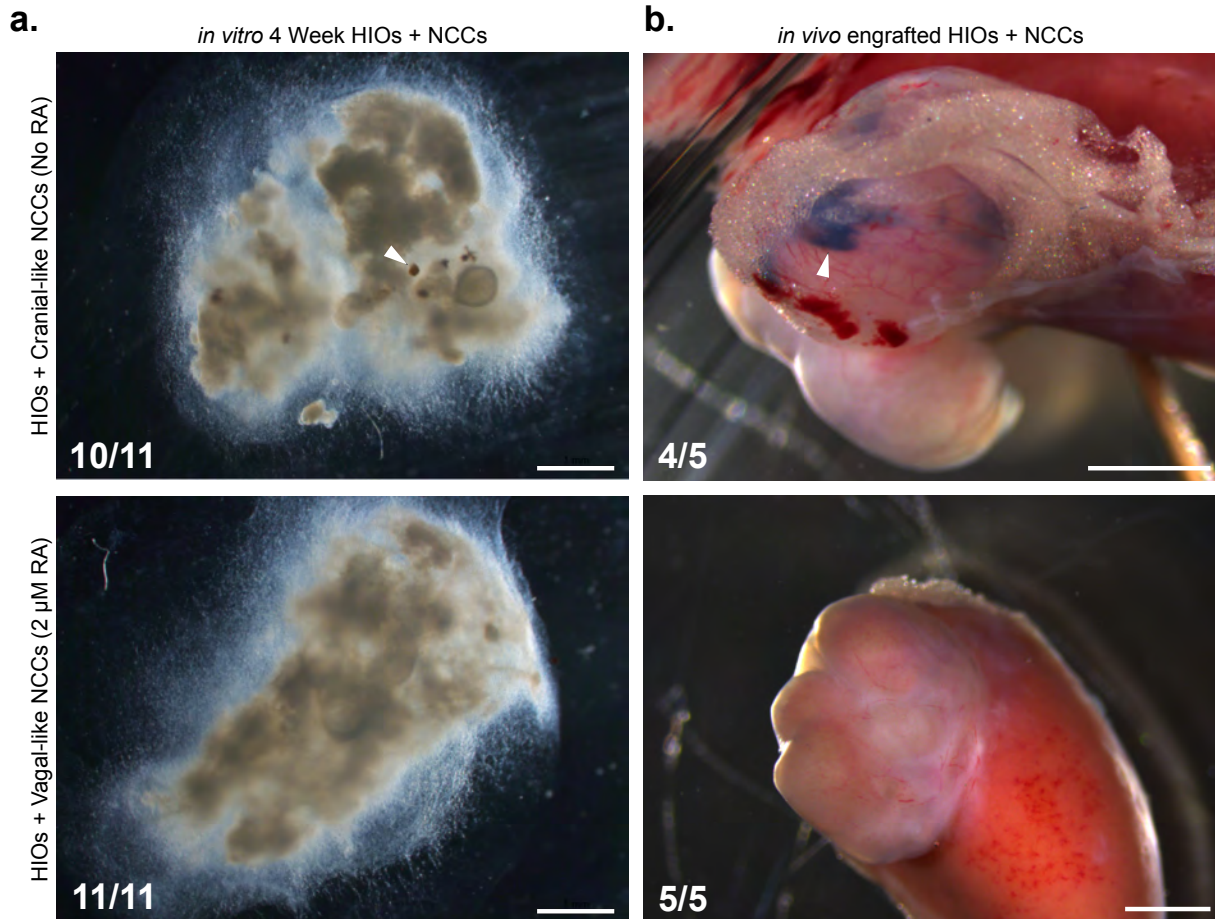

**Supplementary Figure 6.** HIOs + human cranial- and vagal-like NCCs engrafted *in vivo*.

(**a** and **b**) PSC-derived cranial/*HOX*-negative (no RA) and vagal/*HOX*-positive (2  $\mu$ M RA) NCCs were both competent to engraft and form ENS neuroglial cells. Cranial-like NCCs formed pigmented epithelium (arrowhead) *in vitro* (**a**) and *in vivo* (**b**) suggesting a retained competence to form neuroepithelium. Scale bars, 1 mm (left panels), 2 mm (right panels)

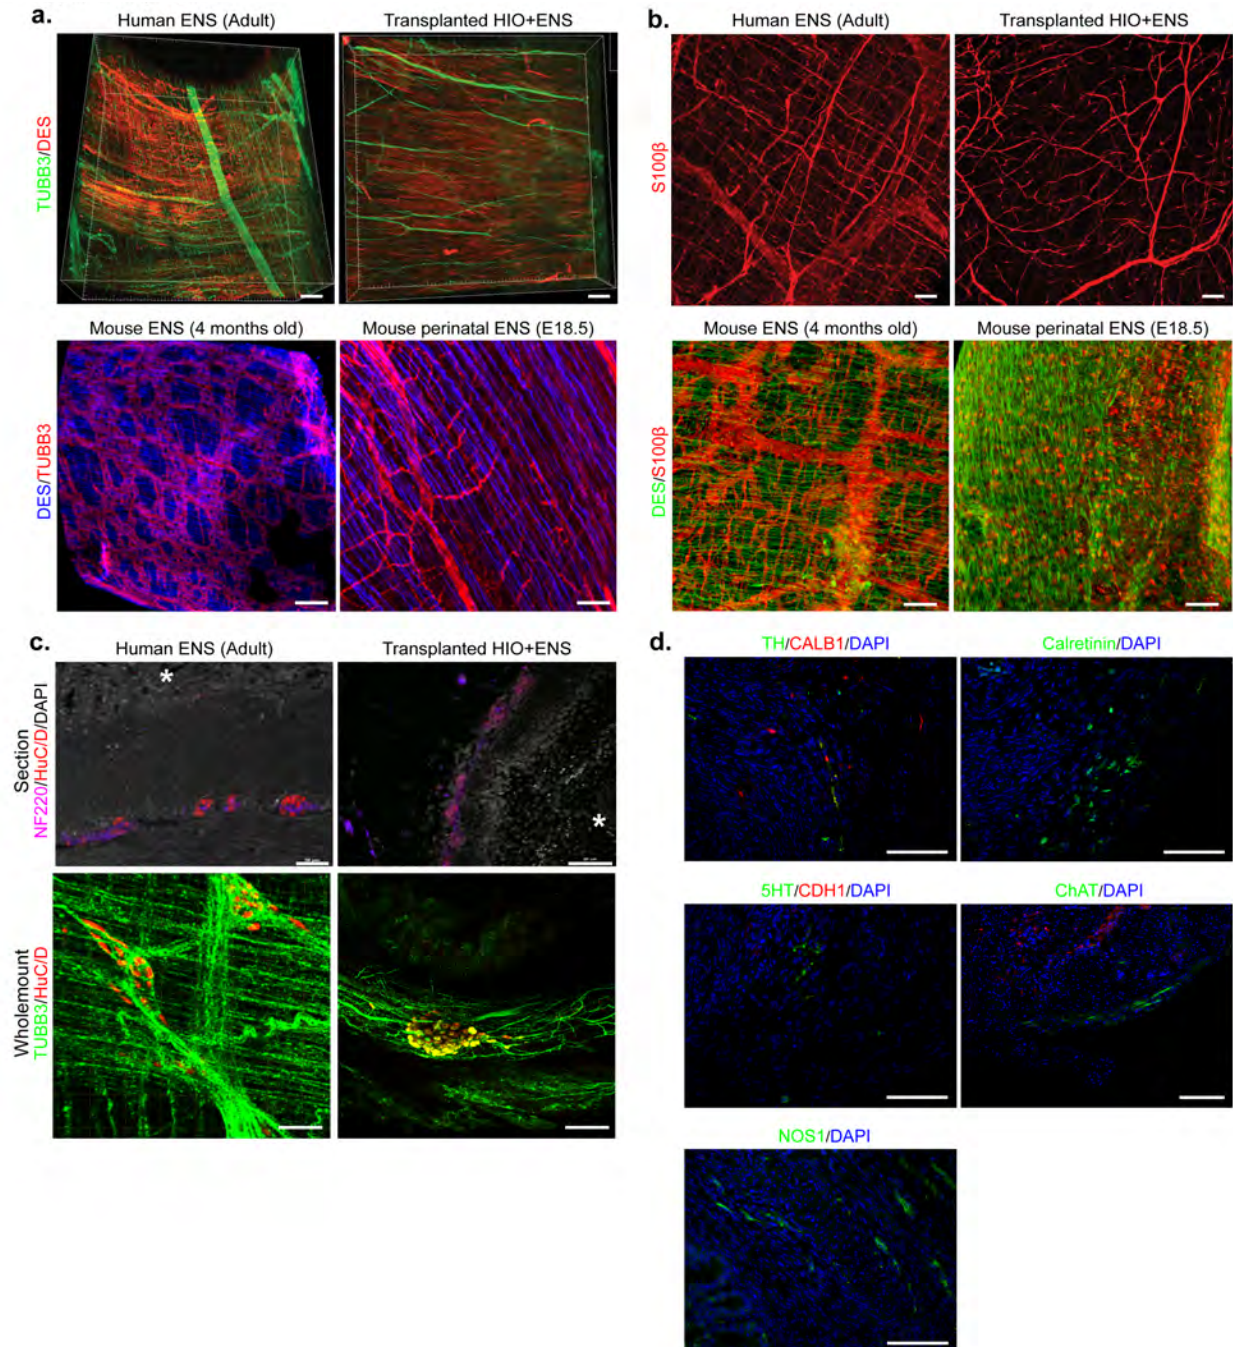

**Supplementary Figure 7.** HIOs+ENS grown *in vivo* form a neuroglial plexus and ganglia-like structures.

**(a)** Whole mount immunostaining for neurons (TUBB3, *en face* view) and muscle (DES, Desmin, *en face* view) shows neuronal network organized above the muscular layer in HIO+ENS (right panel, n=6), reminiscent of the human ENS plexus organization (left panel, n=5). Lower panel shows whole mount immunostaining of developing neurons and smooth muscle in the ENS of adult and perinatal (e18.5) mouse jejunum (n=3). Scale bars, 100  $\mu$ m (upper panels), 50  $\mu$ m (lower panels). **(b)** Whole mount immunostaining for glia (S100 $\beta$ , *en face* view) shows glial network organized similarly in

both human (left panel, n=5) and HIOs+ENS (right panel, n=5). Lower panel shows whole mount immunostaining of developing glia in the ENS of adult and perinatal (e18.5) mouse jejunum (n=3). Scale bar, 100  $\mu$ m (upper panels), 50  $\mu$ m (lower panels). **(c)** In immunostained sections (upper panels), Neurons (NF220) were spread throughout a myenteric-like plexus and contained neuronal cell bodies (HuC/D) in clusters, similar to human myenteric plexus (n=3). Scale bars, 50  $\mu$ m. Whole mount (lower panel) immunostaining for neurons (TUBB3, *en face* view) and neural cell bodies (HuC/D, lateral view) shows neuronal cell bodies organized into a ganglion-like clusters in HIOs+ENS (n=5). Scale bars, 100  $\mu$ m. Data representative of 3 independent experiments. **(d)** Following engraftment *in vivo*, dopaminergic neurons (TH), interneurons (ChAT, 5-HT), sensory neurons (CALB1), excitatory neurons (Calretinin) and inhibitory neurons (nNOS) were all found in HIOs+ENS. Scale bar, 100 $\mu$ m.



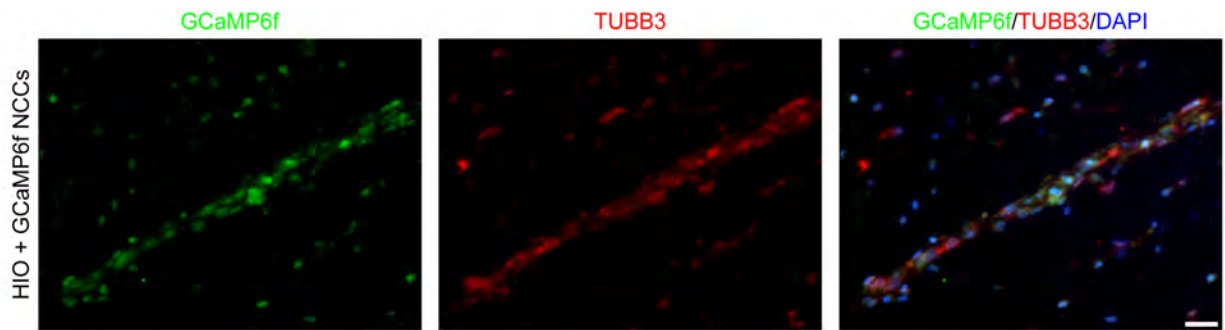

**Supplementary Figure 8.** Neuronal cells express GCaMP6f<sup>+</sup>. Following 28-42 days in culture, HIOs+ GCaMP6f-derived ENS were stained for GFP (GCaMP6f) and TUBB3. GFP is expressed in TUBB3+ cells suggesting that neuronal cells are expressing calcium transients. Scale bar, 50  $\mu$ m. Data shown is a representative example from 4 independent experiments.

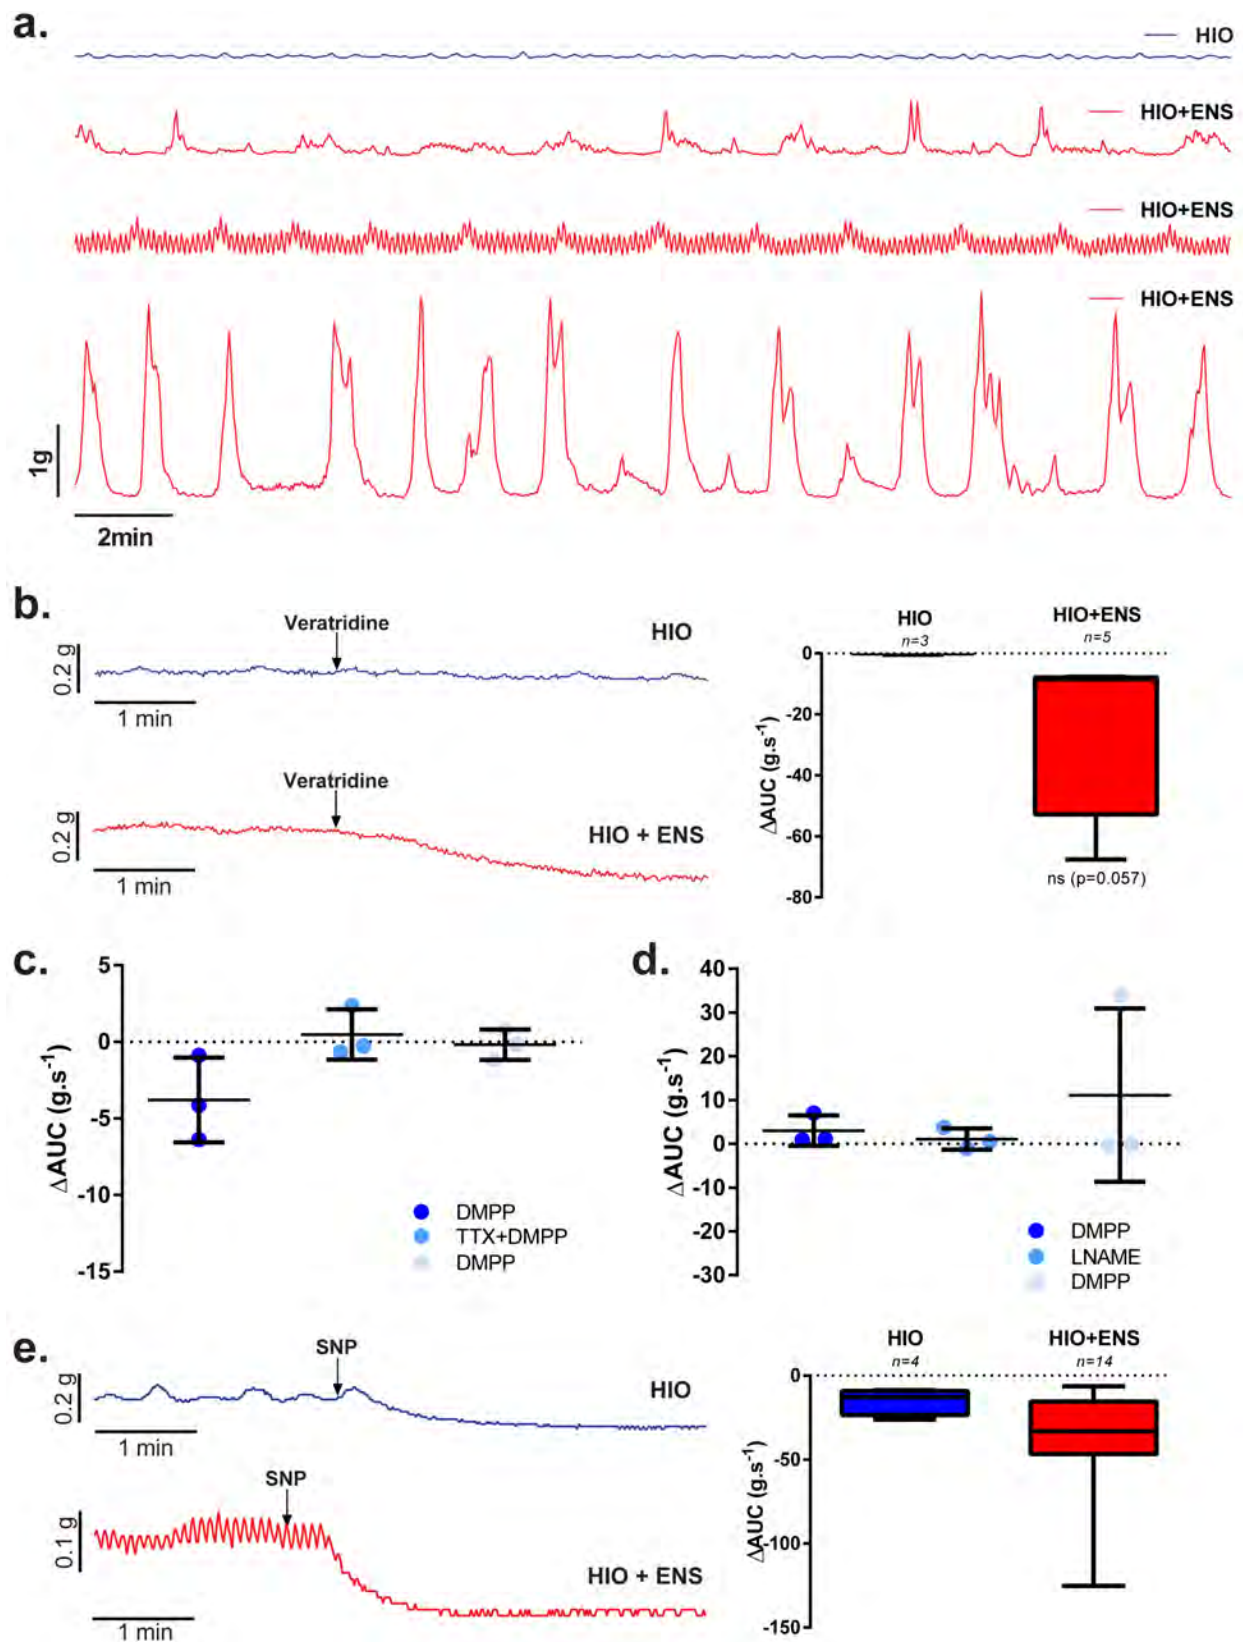

**Supplementary Figure 9.** Neuromuscular coupling in HIOs+ENS.

**(a)** Recordings of spontaneous contractions in transplanted HIOs and HIOs+ENS. **(b)** Left panel shows representative recording of Veratridine stimulation in HIOs (n=3) and HIOs+ENS (n=5). Right panel represents area under the curve (AUC) during Veratridine (3  $\mu$ M) stimulation measured for 2 minutes before and after stimulation. **(c)** Area under the curve during Dimethylphenylpiperazinium (DMPP; 10  $\mu$ M) stimulation measured for 2 minutes before and after stimulation, followed by tetrodotoxin (TTX; 10 $\mu$ M) treatment (n=3). **(d)** Area under the curve during DMPP stimulation measured for 2 minutes after stimulation, followed by NG-nitro-L-arginine methyl ester (L-NAME) treatment (n=3). **(e)** Left panel – representative recordings following Sodium Nitroprusside (SNP) stimulation of both HIOs (n=4) and HIO+ENS tissues (n=14). Right panel – area under the curve during SNP stimulation measured for 2 minutes before and after stimulation. Values in graphs represent mean  $\pm$  s.e.m; Mann & Whitney test.



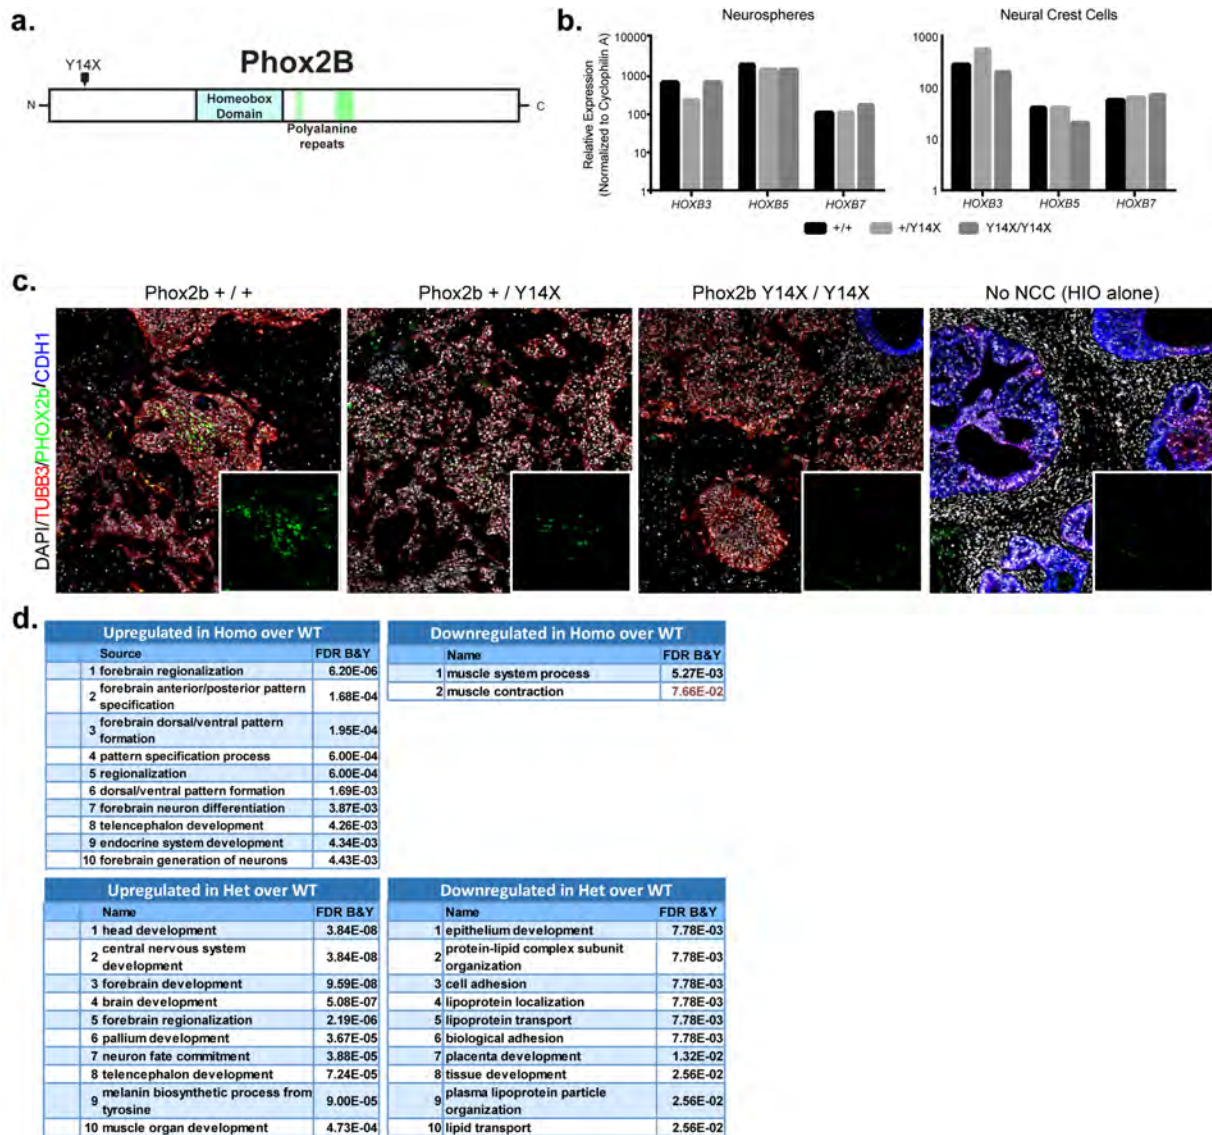

**Supplementary Figure 10.** PHOX2B expression and analysis of HIOs+*PHOX2B* mutant NCCs.

**(a)** Schematic depicting the *PHOX2B* gene, indicating the homeobox domain and the downstream polyalanine sites. Arrow points to the targeted mutation, Y14X, present in the isogenic iPS cells used to generate neural crest cells. **(b)** Quantitative reverse-transcription PCR (qRT-PCR) data of *HOXB* genes in day 6 neurospheres and early passage neural crest cells suggesting similar patterning along the anterior-posterior axis between different *PHOX2B* genotypes at early stages. **(c)** Confocal imaging of *in vitro* cultures of HIOs±NCCs, demonstrating the absence of PHOX2B transcripts in the Y14X homozygous knockout. **(d)** Extended lists of gene ontology categories from RNA-seq analysis of expression differences in HIOs that were recombined with homozygous and heterozygous *PHOX2B* mutations compared to wild-type NCCs.

**Supplementary Video 1.** 3-dimensional image of human intestine showing enteric nerves in association with smooth muscle. Nerves were stained with TUBB3 (green) and smooth muscle was stained with Desmin (red). Nerves were tightly integrated into the layers of smooth muscle. Video corresponds to Supplementary Fig. 7a, top left panel.

**Supplementary Video 2.** 3-dimensional image of HIOs+ENS tissue grown *in vivo* showing human enteric nerves in association with smooth muscle. Nerves were stained with TUBB3 (green) and smooth muscle was stained with Desmin (red). NCC-derived nerves were embedded within the layers of smooth muscle both in the myenteric and submucosal layers. Video corresponds to Supplementary Fig. 7a, top right panel.

**Supplementary Video 3.** Time-lapse video of HIOs+ENS *in vitro* where the ENS was derived from neural crest cells containing a GCaMP6f reporter. Twenty-minute time-lapse video of HIOs+ENS showing  $\text{Ca}^{2+}$  flux specifically in NCC-derived cells. HIOs were generated with H1 cells, which do not have a  $\text{Ca}^{2+}$  indicator. Single neurons have regular periodicity of depolarization. Video corresponds to Supplementary Fig. 3a.

**Supplementary Video 4.** KCl stimulation of HIOs+ENS *in vitro*. Time-lapse video of HIOs+ENS showing broad depolarization of NCC-derived ENS cells in response to KCl addition. NCCs were generated from GCaMP6f expressing iPSCs. Video corresponds to Supplementary Fig. 3b.

**Supplementary Video 5.** Time-lapse video of explanted HIOs+ENS grown *in vivo* using GCaMP6f neural crest cells. A large nerve fiber was imaged where calcium oscillation was observed. NCCs were generated from GCaMP6f expressing iPSCs. Video corresponds to Fig. 3c (left panel).

**Supplementary Video 6.** KCl stimulation of explanted HIOs+ENS grown *in vivo* using GCaMP6f neural crest cells. Time-lapse video of transplanted HIOs+ENS showing depolarization of NCC-derived ENS cells in response to KCl addition. NCCs were generated from GCaMP6f expressing iPSCs. Video corresponds to Fig. 3c, right panel.

**Supplementary Video 7-9.** Time-lapse videos of electrically stimulated HIOs grown *in vivo*. Video 7 corresponds to the left panel of Fig. 4a (HIO) and shows an HIO lacking enteric nerves. Video 8 corresponds to the middle panel of Fig. 4a (HIO+ENS) and shows an HIO containing engrafted neural crest cells. Video 9 corresponds to the right panel of Fig. 4a (HIO+ENS) and shows an HIO containing engrafted neural crest cells that were stimulated in the presence of tetrodotoxin (HIO+ENS + TTX). Videos are played at 16X play speed.

## TABLES

| <b>Primary Antibody</b>                   | <b>Source</b>         | <b>Dilution at RT</b> | <b>Dilution at 4C</b> |
|-------------------------------------------|-----------------------|-----------------------|-----------------------|
| Goat anti-E-Cadherin                      | R&D #AF648            |                       | 1:250                 |
| Rat anti-E-Cadherin                       | R&D #MAB7481          |                       | 1:1000                |
| Mouse anti-E-Cadherin                     | BD #610182            |                       | 1:500                 |
| Rabbit anti- $\beta$ III-tubulin (TUBB3)  | Abcam #ab18207        |                       | 1:2000                |
| Chicken anti- $\beta$ III-tubulin (TUBB3) | Abcam #ab41489        |                       | 1:1000                |
| Rabbit anti-c-kit/CD117 (YR145)           | Abcam #ab32363        |                       | 1:400                 |
| Mouse anti-HuC/D                          | Invitrogen #A21271    |                       | 1:200                 |
| Rabbit anti-PGP9.5                        | Dako #Z511601         |                       | 1:1000                |
| Mouse anti-HNK-1                          | DSHB #1C10            |                       | 1:50                  |
| Mouse anti-p75 <sup>NTR</sup>             | ATS #AB-N07           |                       | 1:200                 |
| Rabbit anti-Ret                           | Aviva #ARP30878       |                       | 1:200                 |
| Goat anti-Peripherin                      | Santa Cruz #sc-7604   |                       | 1:200                 |
| Mouse anti-GFAP                           | Millipore #MAB360     |                       | 1:500                 |
| Rabbit anti-S100 $\beta$                  | Dako #Z031129         |                       | 1:1000                |
| Rabbit anti-nNOS                          | Abcam #ab76067        |                       | 1:1000                |
| Goat anti-Desmin                          | Santa Cruz #sc-7559   |                       | 1:100                 |
| Goat anti-Calretinin                      | Millipore #Ab1550     |                       | 1:2000                |
| Rabbit anti-Calbindin                     | Gift from K. Campbell |                       | 1:4000                |
| Chicken anti-TH                           | Aves #TYH             |                       | 1:500                 |
| Mouse anti-human Nuclei                   | Chemicon #MAB1281     |                       | 1:200                 |
| Chicken anti-NF220                        | Ab-online #ABIN953663 |                       | 1:2000                |
| Rabbit anti-SYN1                          | Abcam #AB8            |                       | 1:500                 |
| Mouse anti-CHGA                           | DHSB #CPTC-CHGA-1     |                       | 1:500                 |
| Rabbit anti-CHAT                          | Millipore             |                       | 1:200                 |
| Rabbit anti-Ki67                          | Thermo #RM-9106       |                       | 1:500                 |
| Goat anti-GFP                             | Abcam #ab6673         |                       | 1:200                 |
|                                           |                       |                       |                       |
| <b>Secondary Antibody</b>                 | <b>Source</b>         | <b>Dilution at RT</b> | <b>Dilution at 4C</b> |
| Donkey anti-mouse 488                     | Jackson Immuno        | 1:500                 | 1:1000                |
| Donkey anti-mouse 546                     | Invitrogen            | 1:500                 | 1:1000                |
| Donkey anti-goat 568                      | Invitrogen            | 1:500                 | 1:1000                |
| Donkey anti-rabbit 546                    | Invitrogen            | 1:500                 | 1:1000                |
| Donkey anti-rabbit 647                    | Jackson Immuno        | 1:500                 | 1:1000                |
| Donkey anti-chicken 549                   | Invitrogen            | 1:500                 | 1:1000                |
| Goat anti-rabbit biotin                   | Vector                | 1:500                 | 1:1000                |



|                         |        |       |        |
|-------------------------|--------|-------|--------|
| Horse anti-mouse biotin | Vector | 1:500 | 1:1000 |
|-------------------------|--------|-------|--------|

Supplementary Table 1 | Antibodies and dilutions for immunohistochemistry

| Gene         | Orientation | Primer Sequence               |
|--------------|-------------|-------------------------------|
| AP2 $\alpha$ | Sense       | <i>ATGCTTTGGAAATTGACGGA</i>   |
|              | Anti-sense  | <i>ATTGACCTACAGTGCCCAGC</i>   |
| Edn3         | Sense       | <i>GCACGTGCTTCACCTACAAG</i>   |
|              | Anti-sense  | <i>GGACAGTCCATAGGGCACC</i>    |
| GAPDH        | Sense       | <i>CCCATCACCATCTTCCAGGAG</i>  |
|              | Anti-sense  | <i>CTTCTCCATGGTGGTGAAGACG</i> |
| GDNF         | Sense       | <i>TCCATGACATCATCGAACTGA</i>  |
|              | Anti-sense  | <i>GTCTGCCTGGTGCTGCTC</i>     |
| HoxA2        | Sense       | <i>CCAAGAAAACCGCACTTCTG</i>   |
|              | Anti-sense  | <i>CATCGGCGATTTCCAGG</i>      |
| HoxB3        | Sense       | <i>CGTCATGAATGGGATCTGC</i>    |
|              | Anti-sense  | <i>ATATTCACATCGAGCCCCAG</i>   |
| HoxB5        | Sense       | <i>GGAAGCTTCACATCAGCCAT</i>   |
|              | Anti-sense  | <i>GGAACTCCTTTTCCAGCTCC</i>   |
| HoxB7        | Sense       | <i>AACTTCCGGATCTACCCCTG</i>   |
|              | Anti-sense  | <i>CTTTCTCCAGCTCCAGGGTC</i>   |
| Pax3         | Sense       | <i>GCCGCATCCTGAGAAGTAAA</i>   |
|              | Anti-sense  | <i>CTTCATCTGATTGGGGTGCT</i>   |
| Pax7         | Sense       | <i>CAAACACAGCATCGACGG</i>     |
|              | Anti-sense  | <i>CTTCAGTGGGAGGTCAGGTT</i>   |
| Snail2       | Sense       | <i>TGACCTGTCTGCAAATGCTC</i>   |
|              | Anti-sense  | <i>CAGACCCTGGTTGCTTCAA</i>    |
| Sox10        | Sense       | <i>AGCTCAGCAAGACGCTGG</i>     |
|              | Anti-sense  | <i>CTTTCTTGTGCTGCATACGG</i>   |

|      |            |                             |
|------|------------|-----------------------------|
| Sox9 | Sense      | <i>GTAATCCGGGTGGTCCTTCT</i> |
|      | Anti-sense | <i>GTACCCGCACTTGCACAAC</i>  |
| Zic1 | Sense      | <i>AAGATCCACAAAAGGACGCA</i> |
|      | Anti-sense | <i>CACGTGCATGTGCTTCTTG</i>  |

Supplementary Table 2 | Primers for qPCR.
